# Supplementary material
Source: Springer Nature journal article supplement (https://www.springermedizin.de/resource/supplementary/12876_2013_1041_MOESM4_ESM.pdf/9438482)

**A**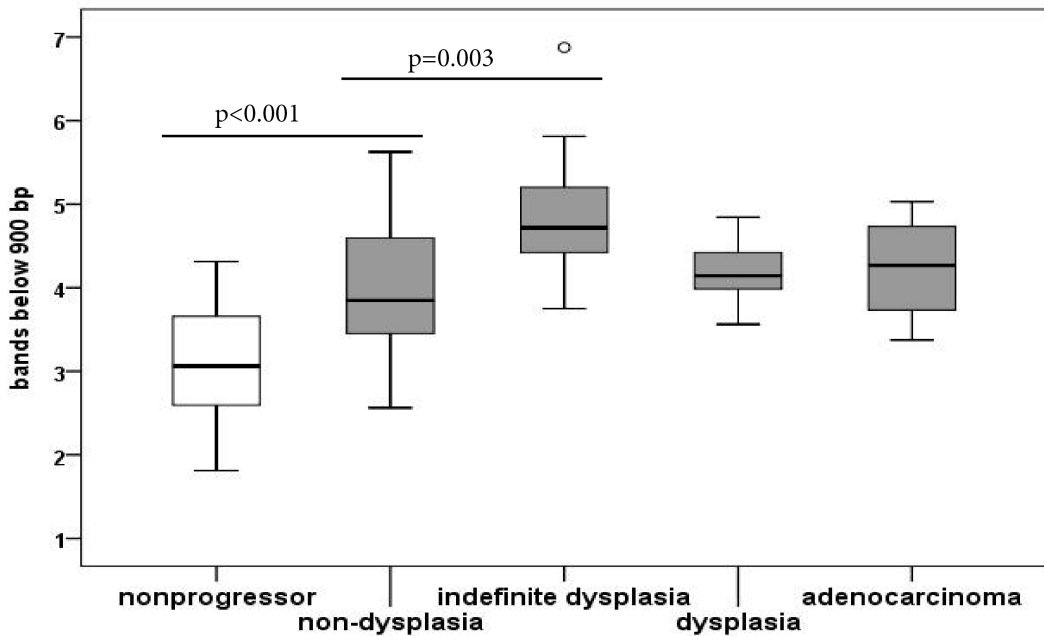**B**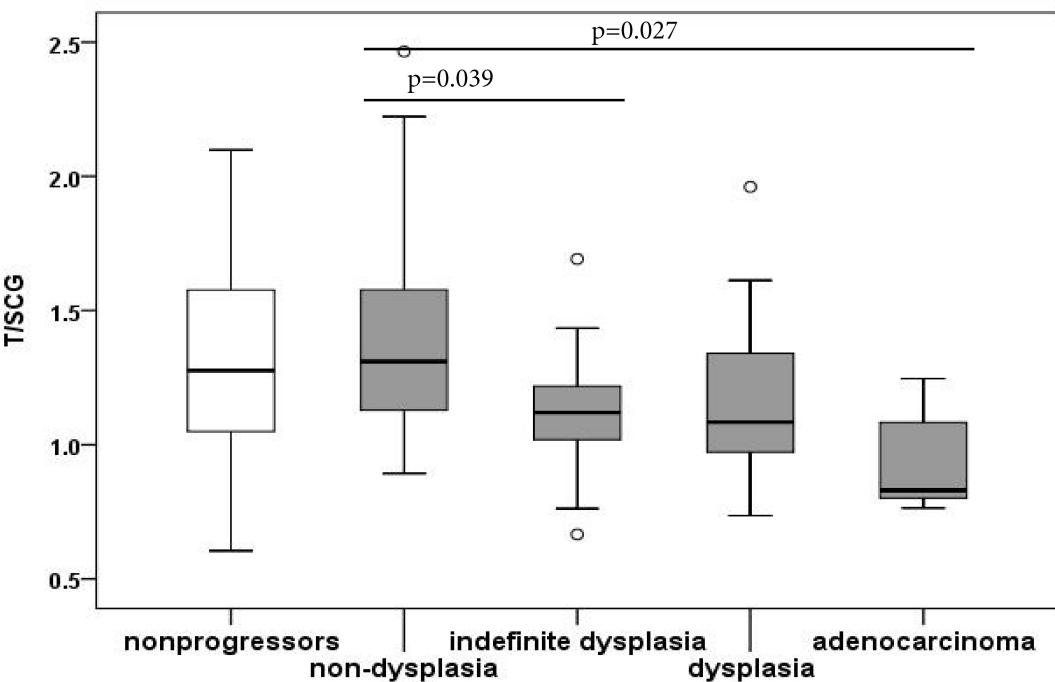

Supplement: MOESM4 [file 9438482]
